# Supplementary material for: A unified evaluation descriptor for π-bridges applied to metalloporphyrin derivatives
Source: Royal Society of Chemistry journal article supplement (doi:10.1039/d4cp02787f), 2024-01-01
Supplement: d4cp02787f1.pdf [file d4cp02787f1.pdf]

Supporting Information

**A unified evaluation descriptor for  $\pi$ -bridges applied to  
metalloporphyrin derivatives**

Meng-Tian Han,<sup>a</sup> Liu Wu,<sup>a</sup> Jian-Ping Wang,<sup>b</sup> Ming-Yue Sui<sup>\*a</sup> and Guang-Yan Sun <sup>\*a,c</sup>

<sup>a</sup> *Department of Chemistry, Faculty of Science, Yanbian University, Yanji, Jilin, 133002 China.*

*\*E-mail: mysui@ybu.edu.cn; gysun@ybu.edu.cn.*

<sup>b</sup> *Xi'an Key Laboratory of Advanced Photo-electronics Materials and Energy Conversion Device,  
Xijing University, Xi'an, Shaanxi, 710123, China.*

<sup>c</sup> *School of Applied Chemistry and Materials, Zhuhai College of Science and Technology, Zhuhai,  
Guangdong, 519041, China*

# S.1 Computational Details

## S.1.1 Reorganization Energy

As for total reorganization energy  $\lambda$ , it is decomposed into internal reorganization energy ( $\lambda_{\text{int}}$ ) and external reorganization energy ( $\lambda_{\text{ext}}$ ). And the  $\lambda_{\text{ext}}$  could be estimated to be 0.11 eV.[1] The  $\lambda_{\text{int}}$  can be approximated by:[2]

$$\lambda_{\text{int}} = \left[ E(A^-) - E(A) \right] + \left[ E^+(D) - E^+(D^+) \right] \quad (1)$$

among them,  $E(A^-)$  and  $E(A)$  are the energies of the neutral acceptor at the anionic and optimal ground-state geometries, respectively.  $E(D^+)$  and  $E^+(D^+)$  are the energies of the cation donor at the neutral and optimal cation geometries, respectively.

## S.1.2 Electronic Coupling

The generalized Mulliken-Hush (GMH) method was used to calculate the  $V_{\text{DA}}$  of D/A complex. And  $V_{\text{DA}}$  of two excited states can be expressed as:[3, 4]

$$V_{\text{DA}} = \frac{\mu_{\text{tr}} \Delta E}{\sqrt{(\Delta\mu)^2 + 4(\mu_{\text{tr}})^2}} \quad (2)$$

where  $\mu_{\text{tr}}$  is the average transition dipole moment,  $\Delta E$  corresponds to the vertical excitation energy, and  $\Delta\mu$  is the dipole moment difference between initial state  $S_0$  and final state  $S_n$ .

## S.1.3 Gibbs Free Energy Change

During the charge transfer process between the donor and acceptor interfaces, the Gibbs free energy change of charge transfer ( $\Delta G_{\text{CT}}$ ) and the Gibbs free energy change of charge recombination ( $\Delta G_{\text{CR}}$ ). The calculation of  $\Delta G_{\text{CR}}$  is as follows:[5]

$$\Delta G_{\text{CR}} = E_{\text{IP}}(D) - E_{\text{EA}}(A) \quad (3)$$

where  $E_{\text{IP}}(D)$  is the ionization potential of the donor, and  $E_{\text{EA}}(A)$  is the electron affinity energy of the acceptor, which could be approximated by the HOMO energy level of donor and the LUMO energy level of acceptor.  $\Delta G_{\text{CT}}$  could be expressed as:[5]

$$\Delta G_{\text{CT}} = -\Delta G_{\text{CR}} - \Delta E_{0-0} - E_{\text{b}} \quad (4)$$

where  $\Delta E_{0-0}$  is the lowest excited state energy of the free-base donor, and  $E_{\text{b}}$  is the exciton binding energy.

## S.2 Tables and Figures

### Figures:

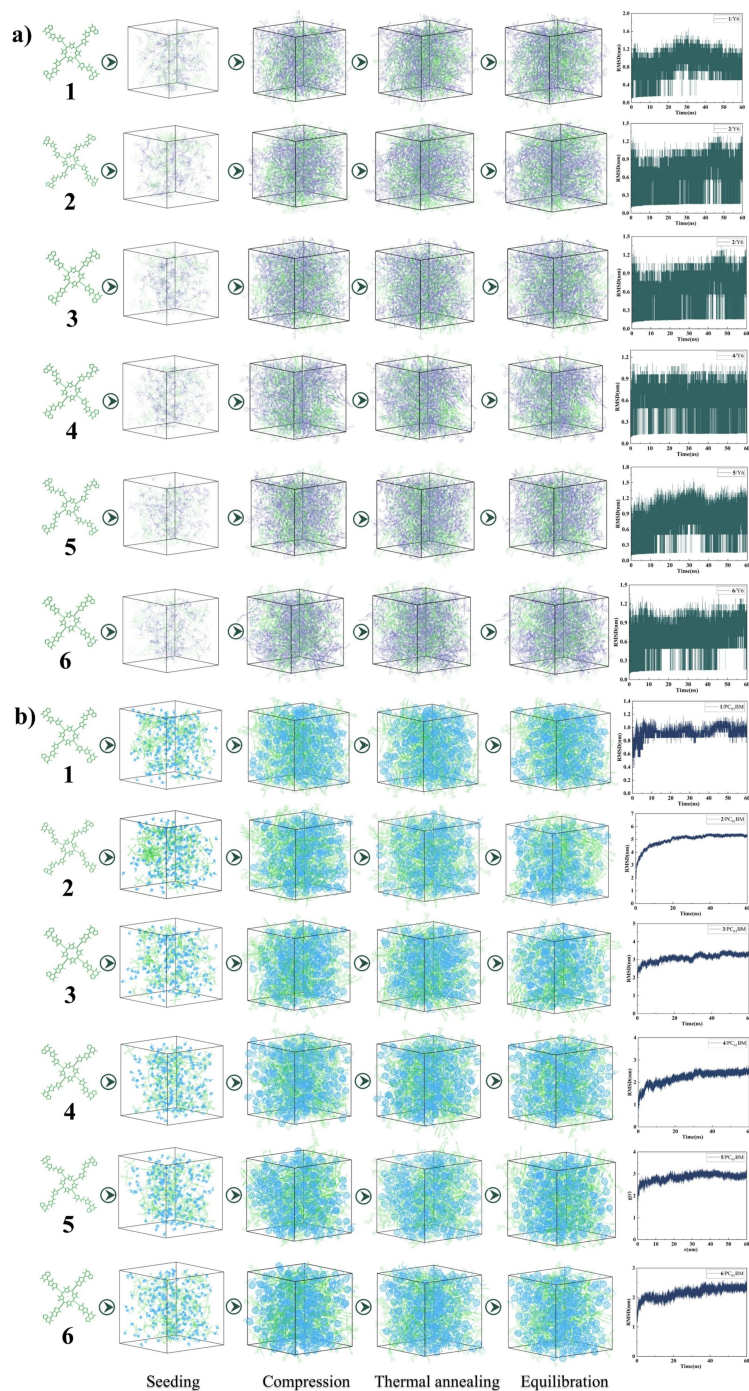

**Fig. S1** In the process of molecular dynamics simulation for a) 1/Y6 ~ 6/Y6 b) 1/PC<sub>61</sub>BM ~ 6/PC<sub>61</sub>BM, the snapshot of molecular structure, energy minimization, NPT ensemble and finished product simulation, and the plot of root mean square deviation (RMSD) of MD simulation.

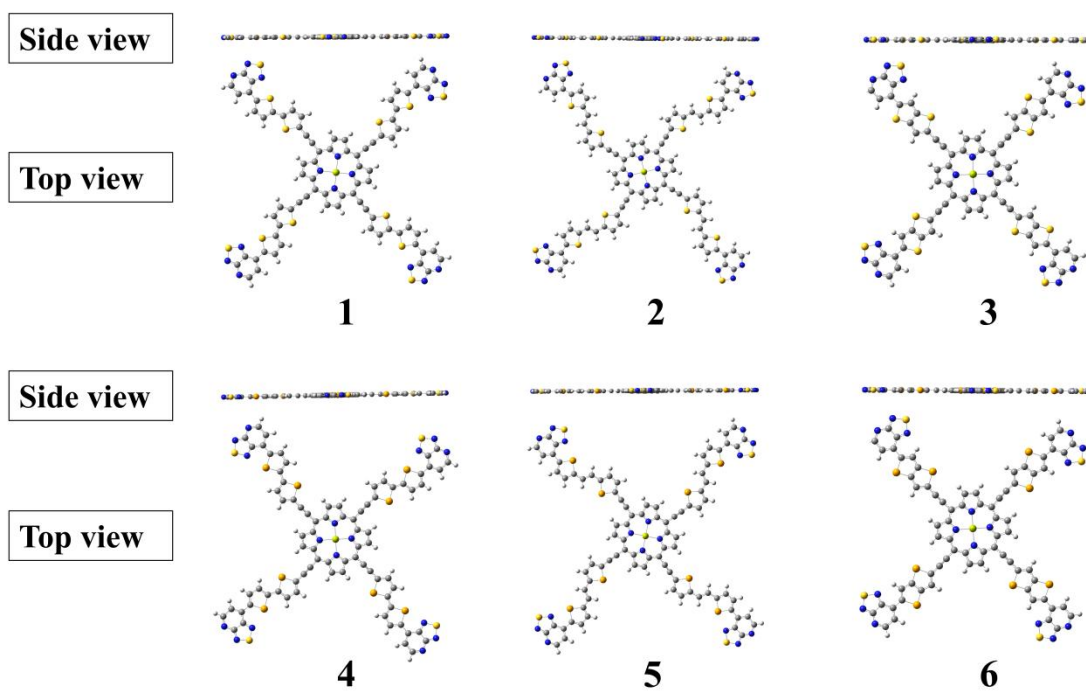

**Fig. S2** Optimized ground state molecular geometry using the B3LYP/6-31G(d) method.

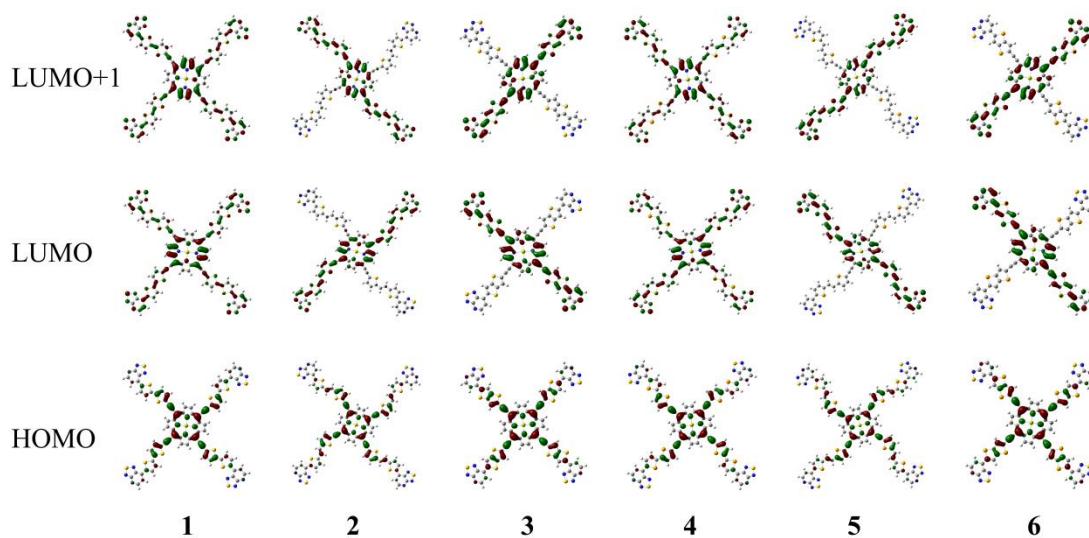

**Fig. S3** The FMOs of the 1~6.

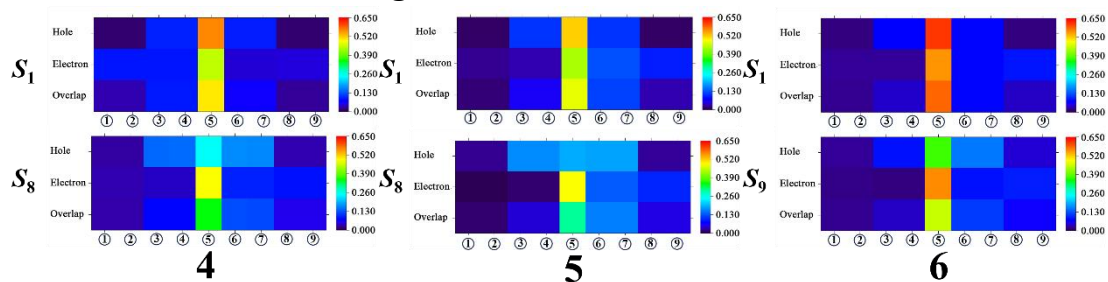

**Fig. S4** Part of heat maps associated with the major excited states for the composition of fragments in the hole and electron. (The horizontal coordinate represents the fragments number)

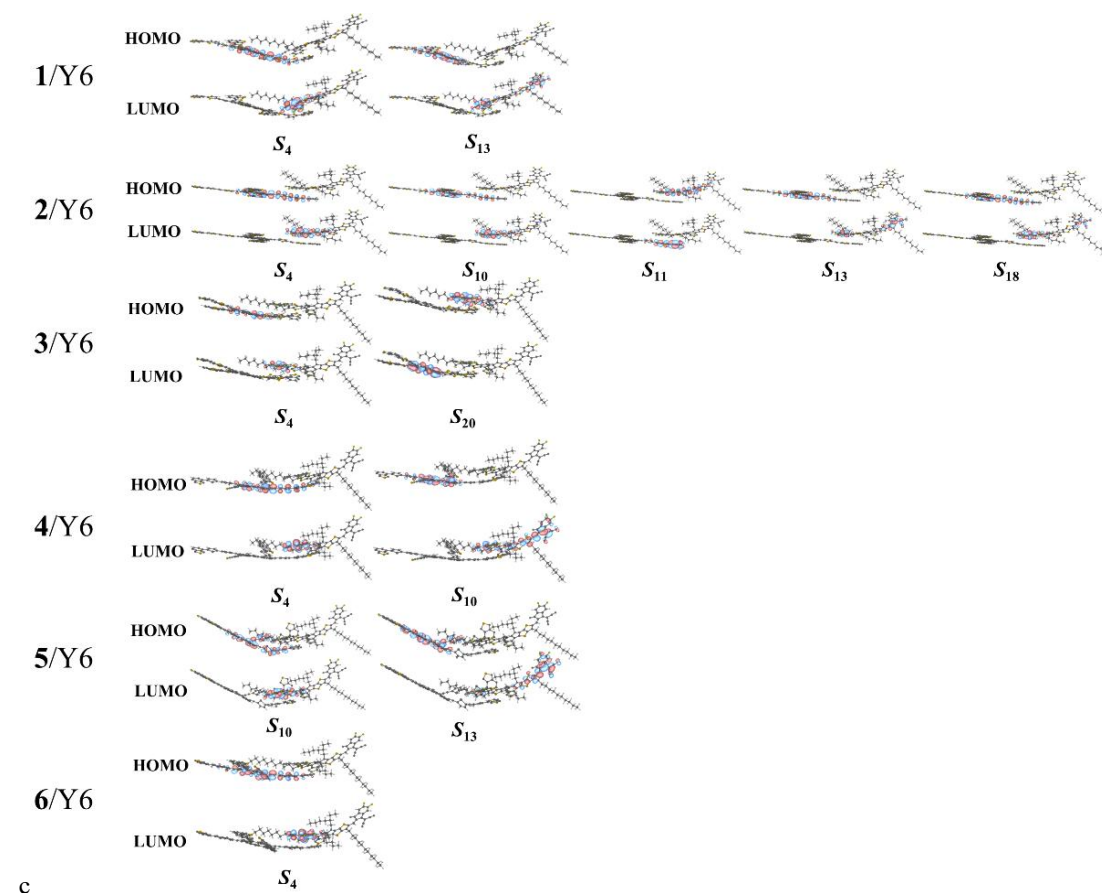

**Fig. S5** Charge density difference maps of inter-CT excited states for 1 ~ 6/Y6 heterojunctions, where the red and blue colors stand for the increase and decrease in electron density, respectively.

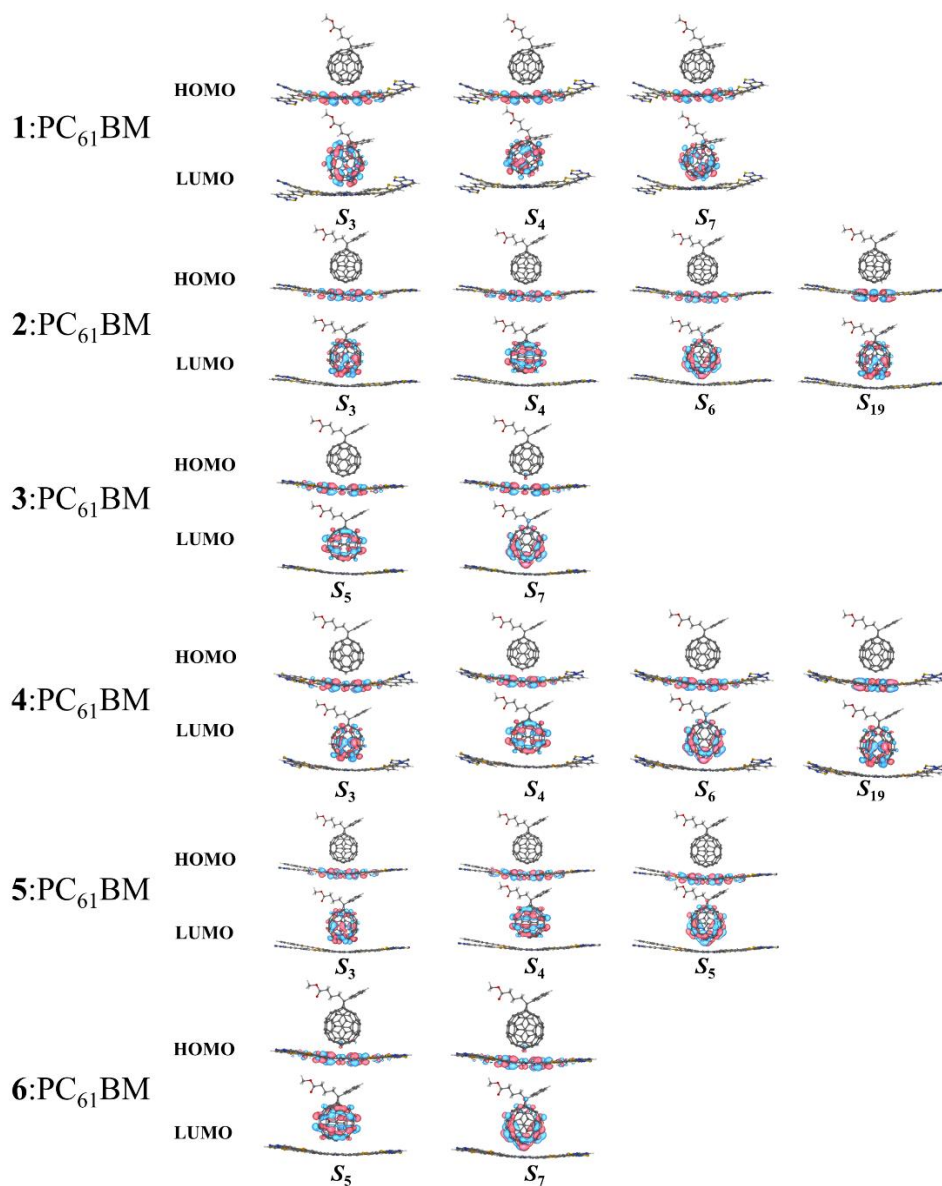

**Fig. S6** Charge density difference maps of inter-CT excited states for 1 ~ 6/PC<sub>61</sub>BM heterojunctions.

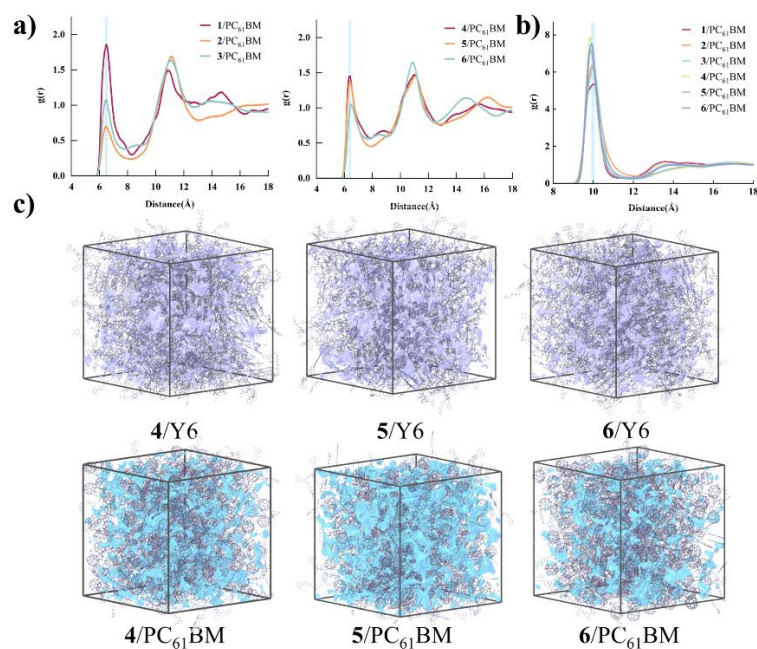

**Fig. S7** (a) The COM RDFs of the distances for 1/PC<sub>61</sub>BM ~ 6/ PC<sub>61</sub>BM interfaces. (b) COM RDFs of C<sub>60</sub>/C<sub>60</sub> interfaces. (c) The free region in the systems simulated by molecular dynamics, isosurface = 0.5.

## Tables:

**Table S1** The HOMO and LUIMO contribution of 1 ~ 6.

|          | Energy level | Fragment A | Fragment $\pi$ | Fragment D |
|----------|--------------|------------|----------------|------------|
| <b>1</b> | HOMO         | 5.42%      | 37.44%         | 57.14%     |
|          | LUMO         | 28.62%     | 25.50%         | 45.87%     |
| <b>2</b> | HOMO         | 4.20%      | 42.80%         | 53.00%     |
|          | LUMO         | 20.61%     | 31.97%         | 47.42%     |
| <b>3</b> | HOMO         | 8.03%      | 31.41%         | 60.56%     |
|          | LUMO         | 26.42%     | 20.08%         | 53.49%     |
| <b>4</b> | HOMO         | 5.78%      | 38.80%         | 55.41%     |
|          | LUMO         | 30.82%     | 27.85%         | 41.31%     |
| <b>5</b> | HOMO         | 4.79%      | 44.19%         | 51.02%     |
|          | LUMO         | 27.31%     | 33.26%         | 39.44%     |
| <b>6</b> | HOMO         | 8.11%      | 32.18%         | 59.70%     |
|          | LUMO         | 26.43%     | 21.62%         | 51.94%     |

**Table S2** The value of FMO energy levels (eV), energy driving force  $\Delta E_{H-H}/\Delta E_{L-L}$  (eV), and open-circuit voltage  $V_{OC}$  (eV) for the **1**/PC<sub>61</sub>BM ~ **6**/PC<sub>61</sub>BM.

|                     | HOMO  | LUMO  | $\Delta E_{H-H}$ | $\Delta E_{L-L}$ | $V_{OC}$ |
|---------------------|-------|-------|------------------|------------------|----------|
| <b>1</b>            | -4.92 | -3.20 | 0.91             | 0.71             | 0.71     |
| <b>2</b>            | -4.90 | -3.22 | 0.93             | 0.69             | 0.69     |
| <b>3</b>            | -5.10 | -3.32 | 0.73             | 0.59             | 0.89     |
| <b>4</b>            | -4.89 | -3.23 | 0.94             | 0.68             | 0.68     |
| <b>5</b>            | -4.82 | -3.21 | 1.01             | 0.70             | 0.61     |
| <b>6</b>            | -5.07 | -3.32 | 0.76             | 0.59             | 0.86     |
| PC <sub>61</sub> BM | -5.83 | -3.91 | —                | —                | —        |

**Table S3** The excitation energy  $E$  (eV), the oscillator strength  $f$  and the main transition components of **1** ~ **6**.

|          | $E(\lambda)$          | $f$    | Composition <sup>a</sup>                                     |
|----------|-----------------------|--------|--------------------------------------------------------------|
| <b>1</b> | $S_1$ 1.51(819.30)    | 1.4834 | H→L(94.9%)                                                   |
|          | $S_9$ 2.16(573.39)    | 1.6312 | H-3→L(86.4%), H-4→L(5.9%)                                    |
|          | $S_{13}$ 2.36(524.33) | 0.5021 | H-4→L(37.5%), H-4→L+1(19.5%),<br>H-1→L+2(16.5%), H-3→L(6.9%) |
| <b>2</b> | $S_1$ 1.47(841.60)    | 1.7746 | H→L(93.8%)                                                   |
|          | $S_8$ 2.04(608.12)    | 1.6045 | H-1→L(91.7%)                                                 |
|          | $S_{13}$ 2.29(541.49) | 0.8182 | H-2→L+2(49.9%), H-4→L(29.8%)                                 |
| <b>3</b> | $S_1$ 1.57(789.96)    | 1.3238 | H→L(83.6%), H→L+1(9.8%)                                      |
|          | $S_9$ 2.30(538.45)    | 1.7934 | H-4→L(74.1%), H-1→L+1(13.0%)                                 |
| <b>4</b> | $S_1$ 1.46(848.57)    | 1.5617 | H→L(90.8%), H→L+1(5.1%)                                      |
|          | $S_8$ 2.09(592.57)    | 1.5623 | H-3→L(86.1%)                                                 |
|          | $S_{13}$ 2.30(538.36) | 0.5361 | H-1→L+2(36.9%), H-4→L+1(30.2%),<br>H-4→L(12.2%)              |
| <b>5</b> | $S_1$ 1.41(878.14)    | 1.8379 | H→L(88.4%), H→L+1(7.8%)                                      |
|          | $S_8$ 1.96(633.45)    | 1.5139 | H-1→L(91.2%)                                                 |



|          |          |              |        |                               |
|----------|----------|--------------|--------|-------------------------------|
|          | $S_{13}$ | 2.18(568.27) | 0.4867 | H-2→L+2(86.0%), H-4→L+1(6.5%) |
| <b>6</b> | $S_1$    | 1.54(803.74) | 1.3581 | H→L(89.8%)                    |
|          | $S_9$    | 2.27(546.40) | 1.7296 | H-4→L(77.9%), H-1→L+1(10.6%)  |

<sup>a</sup>H and L represent HOMO and LUMO, respectively.

**Table S4** Charger transfer and electron redistribution for the difference fragments.

|          | charger transfer    | electron redistribution | charger transfer | electron redistribution |
|----------|---------------------|-------------------------|------------------|-------------------------|
| <b>1</b> | A(1): 0.05018       | A(1): 0.00076           | <b>4</b>         | A(1): 0.07617           |
|          | A(2): 0.05018       | A(2): 0.00076           |                  | A(2): 0.07617           |
|          | $\pi$ (1): -0.02806 | $\pi$ (1): 0.00542      |                  | $\pi$ (1): -0.00583     |
|          | $\pi$ (2): -0.02806 | $\pi$ (2): 0.00542      |                  | $\pi$ (2): -0.00582     |
|          | D: -0.08502         | D: 0.30231              |                  | D: -0.11708             |
|          | $\pi$ (3): -0.02804 | $\pi$ (3): 0.00544      |                  | $\pi$ (3): -0.04574     |
|          | $\pi$ (4): -0.02805 | $\pi$ (4): 0.00544      |                  | $\pi$ (4): -0.04574     |
|          | A(3): 0.04924       | A(3): 0.00076           |                  | A(3): 0.03393           |
|          | A(4): 0.04924       | A(4): 0.00076           |                  | A(4): 0.03393           |
| <b>2</b> | A(1): 0.05401       | A(1): 0.00064           | <b>5</b>         | A(1): -0.01370          |
|          | A(2): 0.05401       | A(2): 0.00064           |                  | A(2): -0.01370          |
|          | $\pi$ (1): 0.00502  | $\pi$ (1): 0.01126      |                  | $\pi$ (1): -0.07155     |
|          | $\pi$ (2): 0.00502  | $\pi$ (2): 0.01126      |                  | $\pi$ (2): -0.07155     |
|          | D: -0.03165         | D: 0.28726              |                  | D: -0.08453             |
|          | $\pi$ (3): -0.05851 | $\pi$ (3): 0.00435      |                  | $\pi$ (3): 0.01696      |
|          | $\pi$ (4): -0.05851 | $\pi$ (4): 0.00435      |                  | $\pi$ (4): 0.01696      |
|          | A(3): 0.01530       | A(3): 0.00022           |                  | A(3): 0.08315           |
|          | A(4): 0.01530       | A(4): 0.00022           |                  | A(4): 0.08315           |
| <b>3</b> | A(1): 0.05906       | A(1): 0.00129           | <b>6</b>         | A(1): 0.00947           |
|          | A(2): 0.05906       | A(2): 0.00129           |                  | A(2): 0.00947           |
|          | $\pi$ (1): -0.01053 | $\pi$ (1): 0.00440      |                  | $\pi$ (1): -0.05105     |
|          | $\pi$ (2): -0.01053 | $\pi$ (2): 0.00440      |                  | $\pi$ (2): -0.05105     |
|          | D: -0.05558         | D: 0.37759              |                  | D: -0.06126             |
|          |                     |                         |                  | D: 0.35825              |

|                     |                    |                    |                    |
|---------------------|--------------------|--------------------|--------------------|
| $\pi(3)$ : -0.04140 | $\pi(3)$ : 0.00228 | $\pi(3)$ : 0.00102 | $\pi(3)$ : 0.00557 |
| $\pi(4)$ : -0.04140 | $\pi(4)$ : 0.00228 | $\pi(4)$ : 0.00102 | $\pi(4)$ : 0.00557 |
| A(3): -0.02065      | A(3): 0.00064      | A(3): 0.07119      | A(3): 0.00155      |
| A(4): -0.02065      | A(4): 0.00064      | A(4): 0.07119      | A(4): 0.00155      |

**Table S5** Net electrons transferred between the fragments.

|          |                                   | Net      |          |                                   | Net      |
|----------|-----------------------------------|----------|----------|-----------------------------------|----------|
| <b>1</b> | A(1) $\rightarrow$ $\pi$ (1)      | -0.00480 | <b>4</b> | A(1) $\rightarrow$ $\pi$ (1)      | -0.00723 |
|          | A(1) $\rightarrow$ $\pi$ (2)      | -0.00480 |          | A(1) $\rightarrow$ $\pi$ (2)      | -0.00723 |
|          | A(1) $\rightarrow$ D              | -0.03084 |          | A(1) $\rightarrow$ D              | -0.04539 |
|          | A(1) $\rightarrow$ $\pi$ (3)      | -0.00485 |          | A(1) $\rightarrow$ $\pi$ (3)      | -0.00764 |
|          | A(1) $\rightarrow$ $\pi$ (4)      | -0.00485 |          | A(1) $\rightarrow$ $\pi$ (4)      | -0.00764 |
|          | A(1) $\rightarrow$ A(3)           | -0.00002 |          | A(1) $\rightarrow$ A(3)           | -0.00052 |
|          | A(1) $\rightarrow$ A(4)           | -0.00002 |          | A(1) $\rightarrow$ A(4)           | -0.00052 |
|          | A(2) $\rightarrow$ $\pi$ (1)      | -0.00480 |          | A(2) $\rightarrow$ $\pi$ (1)      | -0.00723 |
|          | A(2) $\rightarrow$ $\pi$ (2)      | -0.00480 |          | A(2) $\rightarrow$ $\pi$ (2)      | -0.00723 |
|          | A(2) $\rightarrow$ D              | -0.03084 |          | A(2) $\rightarrow$ D              | -0.04539 |
|          | A(2) $\rightarrow$ $\pi$ (3)      | -0.00485 |          | A(2) $\rightarrow$ $\pi$ (3)      | -0.00764 |
|          | A(2) $\rightarrow$ $\pi$ (4)      | -0.00485 |          | A(2) $\rightarrow$ $\pi$ (4)      | -0.00764 |
|          | A(2) $\rightarrow$ A(3)           | -0.00002 |          | A(2) $\rightarrow$ A(3)           | -0.00052 |
|          | A(2) $\rightarrow$ A(4)           | -0.00002 |          | A(2) $\rightarrow$ A(4)           | -0.00052 |
|          | $\pi$ (1) $\rightarrow$ D         | 0.00911  |          | $\pi$ (1) $\rightarrow$ D         | -0.00765 |
|          | $\pi$ (1) $\rightarrow$ $\pi$ (3) | -0.00005 |          | $\pi$ (1) $\rightarrow$ $\pi$ (3) | -0.00376 |
|          | $\pi$ (1) $\rightarrow$ $\pi$ (4) | -0.00005 |          | $\pi$ (1) $\rightarrow$ $\pi$ (4) | -0.00376 |
|          | $\pi$ (1) $\rightarrow$ A(3)      | 0.00473  |          | $\pi$ (1) $\rightarrow$ A(3)      | 0.00326  |
|          | $\pi$ (1) $\rightarrow$ A(4)      | 0.00473  |          | $\pi$ (1) $\rightarrow$ A(4)      | 0.00326  |
|          | $\pi$ (2) $\rightarrow$ D         | 0.00911  |          | $\pi$ (2) $\rightarrow$ D         | -0.00765 |
|          | $\pi$ (2) $\rightarrow$ $\pi$ (3) | -0.00005 |          | $\pi$ (2) $\rightarrow$ $\pi$ (3) | -0.00376 |
|          | $\pi$ (2) $\rightarrow$ $\pi$ (4) | -0.00005 |          | $\pi$ (2) $\rightarrow$ $\pi$ (4) | -0.00376 |
|          | $\pi$ (2) $\rightarrow$ A(3)      | 0.00473  |          | $\pi$ (2) $\rightarrow$ A(3)      | 0.00326  |
|          | $\pi$ (2) $\rightarrow$ A(4)      | 0.00473  |          | $\pi$ (2) $\rightarrow$ A(4)      | 0.00326  |

|          |                             |          |          |                             |          |
|----------|-----------------------------|----------|----------|-----------------------------|----------|
|          | $D \rightarrow \pi(3)$      | -0.00952 |          | $D \rightarrow \pi(3)$      | -0.01551 |
|          | $D \rightarrow \pi(4)$      | -0.00952 |          | $D \rightarrow \pi(4)$      | -0.01551 |
|          | $D \rightarrow A(3)$        | 0.03030  |          | $D \rightarrow A(3)$        | 0.02101  |
|          | $D \rightarrow A(4)$        | 0.03030  |          | $D \rightarrow A(4)$        | 0.02101  |
|          | $\pi(3) \rightarrow A(3)$   | 0.00477  |          | $\pi(3) \rightarrow A(3)$   | 0.00372  |
|          | $\pi(3) \rightarrow A(4)$   | 0.00477  |          | $\pi(3) \rightarrow A(4)$   | 0.00372  |
|          | $\pi(4) \rightarrow A(3)$   | 0.00477  |          | $\pi(4) \rightarrow A(3)$   | 0.00371  |
|          | $\pi(4) \rightarrow A(4)$   | 0.00477  |          | $\pi(4) \rightarrow A(4)$   | 0.00371  |
| <b>2</b> | $A(1) \rightarrow \pi(1)$   | -0.00555 | <b>5</b> | $A(1) \rightarrow \pi(1)$   | -0.00217 |
|          | $A(1) \rightarrow \pi(2)$   | -0.00555 |          | $A(1) \rightarrow \pi(2)$   | -0.00217 |
|          | $A(1) \rightarrow D$        | -0.03013 |          | $A(1) \rightarrow D$        | -0.00810 |
|          | $A(1) \rightarrow \pi(3)$   | -0.00606 |          | $A(1) \rightarrow \pi(3)$   | -0.00133 |
|          | $A(1) \rightarrow \pi(4)$   | -0.00606 |          | $A(1) \rightarrow \pi(4)$   | -0.00133 |
|          | $A(1) \rightarrow A(3)$     | -0.00034 |          | $A(1) \rightarrow A(3)$     | -0.00070 |
|          | $A(1) \rightarrow A(4)$     | -0.00034 |          | $A(1) \rightarrow A(4)$     | 0.00070  |
|          | $A(2) \rightarrow \pi(1)$   | -0.00555 |          | $A(2) \rightarrow \pi(1)$   | -0.00217 |
|          | $A(2) \rightarrow \pi(2)$   | -0.00555 |          | $A(2) \rightarrow \pi(2)$   | -0.00217 |
|          | $A(2) \rightarrow D$        | -0.03013 |          | $A(2) \rightarrow D$        | -0.00810 |
|          | $A(2) \rightarrow \pi(3)$   | -0.00606 |          | $A(2) \rightarrow \pi(3)$   | -0.00133 |
|          | $A(2) \rightarrow \pi(4)$   | -0.00606 |          | $A(2) \rightarrow \pi(4)$   | -0.00133 |
|          | $A(2) \rightarrow A(3)$     | -0.00034 |          | $A(2) \rightarrow A(3)$     | 0.00070  |
|          | $A(2) \rightarrow A(4)$     | -0.00034 |          | $A(2) \rightarrow A(4)$     | 0.00070  |
|          | $\pi(1) \rightarrow D$      | -0.00605 |          | $\pi(1) \rightarrow D$      | 0.02887  |
|          | $\pi(1) \rightarrow \pi(3)$ | -0.00657 |          | $\pi(1) \rightarrow \pi(3)$ | 0.00962  |
|          | $\pi(1) \rightarrow \pi(4)$ | -0.00657 |          | $\pi(1) \rightarrow \pi(4)$ | 0.00962  |
|          | $\pi(1) \rightarrow A(3)$   | 0.00154  |          | $\pi(1) \rightarrow A(3)$   | 0.00955  |
|          | $\pi(1) \rightarrow A(4)$   | 0.00154  |          | $\pi(1) \rightarrow A(4)$   | 0.00955  |
|          | $\pi(2) \rightarrow D$      | -0.00605 |          | $\pi(2) \rightarrow D$      | 0.02887  |
|          | $\pi(2) \rightarrow \pi(3)$ | -0.00657 |          | $\pi(2) \rightarrow \pi(3)$ | 0.00962  |
|          | $\pi(2) \rightarrow \pi(4)$ | -0.00657 |          | $\pi(2) \rightarrow \pi(4)$ | 0.00962  |
|          | $\pi(2) \rightarrow A(3)$   | 0.00154  |          | $\pi(2) \rightarrow A(3)$   | 0.00955  |

|          |                             |           |          |                             |          |
|----------|-----------------------------|-----------|----------|-----------------------------|----------|
|          | $\pi(2) \rightarrow A(4)$   | 0.00154   |          | $\pi(2) \rightarrow A(4)$   | 0.00955  |
|          | $D \rightarrow \pi(3)$      | -0.02909  |          | $D \rightarrow \pi(3)$      | 0.01820  |
|          | $D \rightarrow \pi(4)$      | -0.02909  |          | $D \rightarrow \pi(4)$      | 0.01821  |
|          | $D \rightarrow A(3)$        | 0.00873   |          | $D \rightarrow A(3)$        | 0.04483  |
|          | $D \rightarrow A(4)$        | 0.00873   |          | $D \rightarrow A(4)$        | 0.04483  |
|          | $\pi(3) \rightarrow A(3)$   | 0.00208   |          | $\pi(3) \rightarrow A(3)$   | 0.00891  |
|          | $\pi(3) \rightarrow A(4)$   | 0.00208   |          | $\pi(3) \rightarrow A(4)$   | 0.00891  |
|          | $\pi(4) \rightarrow A(3)$   | 0.00208   |          | $\pi(4) \rightarrow A(3)$   | 0.00891  |
|          | $\pi(4) \rightarrow A(4)$   | 0.00208   |          | $\pi(4) \rightarrow A(4)$   | 0.00891  |
| <b>3</b> | $A(1) \rightarrow \pi(1)$   | -0.00442  | <b>6</b> | $A(1) \rightarrow \pi(1)$   | -0.00161 |
|          | $A(1) \rightarrow \pi(2)$   | -0.00442  |          | $A(1) \rightarrow \pi(2)$   | -0.00161 |
|          | $A(1) \rightarrow D$        | -0.03892  |          | $A(1) \rightarrow D$        | -0.00703 |
|          | $A(1) \rightarrow \pi(3)$   | -0.00500  |          | $A(1) \rightarrow \pi(3)$   | -0.00068 |
|          | $A(1) \rightarrow \pi(4)$   | -0.005000 |          | $A(1) \rightarrow \pi(4)$   | -0.00068 |
|          | $A(1) \rightarrow A(3)$     | -0.00066  |          | $A(1) \rightarrow A(3)$     | 0.00107  |
|          | $A(1) \rightarrow A(4)$     | -0.00066  |          | $A(1) \rightarrow A(4)$     | 0.00107  |
|          | $A(2) \rightarrow \pi(1)$   | -0.00442  |          | $A(2) \rightarrow \pi(1)$   | -0.00161 |
|          | $A(2) \rightarrow \pi(2)$   | -0.00442  |          | $A(2) \rightarrow \pi(2)$   | -0.00161 |
|          | $A(2) \rightarrow D$        | -0.03892  |          | $A(2) \rightarrow D$        | -0.00703 |
|          | $A(2) \rightarrow \pi(3)$   | -0.00500  |          | $A(2) \rightarrow \pi(3)$   | -0.00068 |
|          | $A(2) \rightarrow \pi(4)$   | -0.00500  |          | $A(2) \rightarrow \pi(4)$   | -0.00068 |
|          | $A(2) \rightarrow A(3)$     | -0.00066  |          | $A(2) \rightarrow A(3)$     | 0.00107  |
|          | $A(2) \rightarrow A(4)$     | -0.00066  |          | $A(2) \rightarrow A(4)$     | 0.00107  |
|          | $\pi(1) \rightarrow D$      | 0.00278   |          | $\pi(1) \rightarrow D$      | 0.02750  |
|          | $\pi(1) \rightarrow \pi(3)$ | -0.00221  |          | $\pi(1) \rightarrow \pi(3)$ | 0.00386  |
|          | $\pi(1) \rightarrow \pi(4)$ | -0.00221  |          | $\pi(1) \rightarrow \pi(4)$ | 0.00386  |
|          | $\pi(1) \rightarrow A(3)$   | 0.00166   |          | $\pi(1) \rightarrow A(3)$   | 0.00631  |
|          | $\pi(1) \rightarrow A(4)$   | 0.00166   |          | $\pi(1) \rightarrow A(4)$   | 0.00631  |
|          | $\pi(2) \rightarrow D$      | 0.00278   |          | $\pi(2) \rightarrow D$      | 0.02750  |
|          | $\pi(2) \rightarrow \pi(3)$ | -0.00221  |          | $\pi(2) \rightarrow \pi(3)$ | 0.00386  |
|          | $\pi(2) \rightarrow \pi(4)$ | -0.00221  |          | $\pi(2) \rightarrow \pi(4)$ | 0.00386  |

|                          |          |                          |         |
|--------------------------|----------|--------------------------|---------|
| $\pi(2)\rightarrow A(3)$ | 0.00166  | $\pi(2)\rightarrow A(3)$ | 0.00631 |
| $\pi(2)\rightarrow A(4)$ | 0.00166  | $\pi(2)\rightarrow A(4)$ | 0.00631 |
| $D\rightarrow\pi(3)$     | -0.02257 | $D\rightarrow\pi(3)$     | 0.00518 |
| $D\rightarrow\pi(4)$     | -0.02257 | $D\rightarrow\pi(4)$     | 0.00518 |
| $D\rightarrow A(3)$      | 0.01422  | $D\rightarrow A(3)$      | 0.04592 |
| $D\rightarrow A(4)$      | 0.01422  | $D\rightarrow A(4)$      | 0.04592 |
| $\pi(3)\rightarrow A(3)$ | 0.00221  | $\pi(3)\rightarrow A(3)$ | 0.00526 |
| $\pi(3)\rightarrow A(4)$ | 0.00221  | $\pi(3)\rightarrow A(4)$ | 0.00526 |
| $\pi(4)\rightarrow A(3)$ | 0.00221  | $\pi(4)\rightarrow A(3)$ | 0.00526 |
| $\pi(4)\rightarrow A(4)$ | 0.00221  | $\pi(4)\rightarrow A(4)$ | 0.00526 |

**Table S6** Hole/electron composition of each fragments in **1** ~ **6**.

| Fragments |          | Hole  | Electron | Overlap | Fragments |       | Hole   | Electron | Overlap |
|-----------|----------|-------|----------|---------|-----------|-------|--------|----------|---------|
| <b>1</b>  | A(1)     | $S_1$ | 1.22%    | 6.23%   | 2.75%     | $S_9$ | 2.79%  | 4.81%    | 3.66%   |
|           | A(2)     |       | 1.22%    | 6.23%   | 2.75%     |       | 2.78%  | 4.81%    | 3.66%   |
|           | $\pi(1)$ |       | 8.89%    | 6.09%   | 7.36%     |       | 15.15% | 4.87%    | 8.59%   |
|           | $\pi(2)$ |       | 8.89%    | 6.09%   | 7.36%     |       | 15.10% | 4.87%    | 8.59%   |
|           | D        |       | 59.40%   | 50.90%  | 54.98%    |       | 25.82% | 53.53%   | 37.18%  |
|           | $\pi(3)$ |       | 8.96%    | 6.07%   | 7.38%     |       | 16.14% | 6.85%    | 10.51%  |
|           | $\pi(4)$ |       | 8.96%    | 6.07%   | 7.38%     |       | 16.12% | 6.85%    | 10.51%  |
|           | A(3)     |       | 1.23%    | 6.15%   | 2.75%     |       | 3.05%  | 6.71%    | 4.52%   |
|           | A(4)     |       | 1.23%    | 6.15%   | 2.75%     |       | 3.05%  | 6.71%    | 4.52%   |
| <b>2</b>  | A(1)     | $S_1$ | 0.99%    | 6.39%   | 2.52%     | $S_8$ | 2.58%  | 6.68%    | 4.15%   |
|           | A(2)     |       | 0.99%    | 6.40%   | 2.52%     |       | 2.58%  | 6.68%    | 4.15%   |
|           | $\pi(1)$ |       | 10.36%   | 10.87%  | 10.61%    |       | 19.16% | 11.63%   | 14.93%  |
|           | $\pi(2)$ |       | 10.36%   | 10.87%  | 10.61%    |       | 19.16% | 11.63%   | 14.93%  |
|           | D        |       | 55.20%   | 52.04%  | 53.60%    |       | 19.58% | 55.36%   | 32.92%  |
|           | $\pi(3)$ |       | 10.14%   | 4.29%   | 6.59%     |       | 16.37% | 2.70%    | 6.65%   |
|           | $\pi(4)$ |       | 10.14%   | 4.29%   | 6.59%     |       | 16.36% | 2.70%    | 6.64%   |
|           | A(3)     |       | 0.90%    | 2.43%   | 1.48%     |       | 2.10%  | 1.31%    | 1.66%   |
|           | A(4)     |       | 0.90%    | 2.43%   | 1.48%     |       | 2.10%  | 1.31%    | 1.66%   |

|          |          |       |        |        |        |       |        |        |        |
|----------|----------|-------|--------|--------|--------|-------|--------|--------|--------|
| <b>3</b> | A(1)     | $S_1$ | 1.70%  | 7.61%  | 3.60%  | $S_9$ | 4.65%  | 9.59%  | 6.68%  |
|          | A(2)     |       | 1.70%  | 7.61%  | 3.60%  |       | 4.65%  | 9.59%  | 6.68%  |
|          | $\pi(1)$ |       | 7.18%  | 6.12%  | 6.63%  |       | 15.97% | 7.56%  | 10.99% |
|          | $\pi(2)$ |       | 7.18%  | 6.12%  | 6.63%  |       | 15.97% | 7.56%  | 10.99% |
|          | D        |       | 64.29% | 58.73% | 61.45% |       | 38.34% | 58.20% | 47.24% |
|          | $\pi(3)$ |       | 7.27%  | 3.13%  | 4.77%  |       | 7.96%  | 1.77%  | 3.75%  |
|          | $\pi(4)$ |       | 7.27%  | 3.13%  | 4.77%  |       | 7.96%  | 1.77%  | 3.75%  |
|          | A(3)     |       | 1.70%  | 3.77%  | 2.53%  |       | 2.24%  | 1.99%  | 2.11%  |
|          | A(4)     |       | 1.70%  | 3.77%  | 2.53%  |       | 2.24%  | 1.99%  | 2.11%  |
|          | <b>4</b> | A(1)  | $S_1$  | 1.33%  | 8.95%  | 3.45% | $S_8$  | 2.66%  | 3.57%  |
| A(2)     |          |       | 1.33%  | 8.95%  | 3.45%  |       | 2.65%  | 3.57%  | 3.08%  |
| $\pi(1)$ |          |       | 9.40%  | 8.81%  | 9.10%  |       | 14.82% | 3.83%  | 7.53%  |
| $\pi(2)$ |          |       | 9.39%  | 8.81%  | 9.10%  |       | 14.78% | 3.83%  | 7.52%  |
| D        |          |       | 57.54% | 45.83% | 51.35% |       | 24.20% | 49.87% | 34.74% |
| $\pi(3)$ |          |       | 9.23%  | 4.66%  | 6.56%  |       | 17.34% | 8.91%  | 12.43% |
| $\pi(4)$ |          |       | 9.23%  | 4.66%  | 6.56%  |       | 17.14% | 8.91%  | 12.36% |
| A(3)     |          |       | 1.27%  | 4.66%  | 2.44%  |       | 3.22%  | 8.76%  | 5.31%  |
| A(4)     |          |       | 1.27%  | 4.66%  | 2.44%  |       | 3.18%  | 8.76%  | 5.28%  |
| <b>5</b> |          | A(1)  | $S_1$  | 1.03%  | 2.40%  | 1.57% | $S_8$  | 2.21%  | 0.71%  |
|          | A(2)     |       | 1.03%  | 2.40%  | 1.57%  |       | 2.21%  | 0.71%  | 1.25%  |
|          | $\pi(1)$ |       | 10.48% | 3.33%  | 5.90%  |       | 16.72% | 1.21%  | 4.50%  |
|          | $\pi(2)$ |       | 10.48% | 3.33%  | 5.90%  |       | 16.71% | 1.21%  | 4.50%  |
|          | D        |       | 52.73% | 44.27% | 48.32% |       | 18.38% | 49.32% | 30.10% |
|          | $\pi(3)$ |       | 10.96% | 12.65% | 11.78% |       | 19.25% | 13.63% | 16.20% |
|          | $\pi(4)$ |       | 10.96% | 12.65% | 11.78% |       | 19.25% | 13.63% | 16.20% |
|          | A(3)     |       | 1.17%  | 9.48%  | 3.33%  |       | 2.64%  | 9.79%  | 5.09%  |
|          | A(4)     |       | 1.17%  | 9.48%  | 3.33%  |       | 2.65%  | 9.79%  | 5.09%  |
|          | <b>6</b> | A(1)  | $S_1$  | 1.74%  | 2.69%  | 2.16% | $S_9$  | 2.47%  | 2.08%  |
| A(2)     |          |       | 1.74%  | 2.69%  | 2.16%  |       | 2.47%  | 2.08%  | 2.27%  |
| $\pi(1)$ |          |       | 7.60%  | 2.50%  | 4.36%  |       | 8.81%  | 1.91%  | 4.10%  |
| $\pi(2)$ |          |       | 7.60%  | 2.50%  | 4.36%  |       | 8.81%  | 1.91%  | 4.10%  |

|          |        |        |        |        |        |        |
|----------|--------|--------|--------|--------|--------|--------|
| D        | 63.00% | 56.87% | 59.85% | 36.77% | 57.14% | 45.83% |
| $\pi(3)$ | 7.41%  | 7.51%  | 7.46%  | 15.80% | 8.07%  | 11.29% |
| $\pi(4)$ | 7.41%  | 7.51%  | 7.46%  | 15.79% | 8.07%  | 11.29% |
| A(3)     | 1.75%  | 8.87%  | 3.94%  | 4.54%  | 9.37%  | 6.52%  |
| A(4)     | 1.75%  | 8.87%  | 3.94%  | 4.54%  | 9.37%  | 6.52%  |

## References

- [1] Liu T, Troisi A. Absolute rate of charge separation and recombination in a molecular model of the P3HT/PCBM interface. *J Phys Chem C* 2011; 115: 2406-15.
- [2] Li YZ, Pullerits T, Zhao MY, Sun MT. Theoretical characterization of the PC<sub>60</sub>BM:PDDTT model for an organic solar cell. *J Phys Chem C* 2011; 115: 21865-73.
- [3] Voityuk AA. Estimation of electronic coupling in  $\pi$ -stacked donor-bridge-acceptor systems: Correction of the two-state model. *J Chem Phys* 2006; 124: 64505.
- [4] Hsu CP. The electronic couplings in electron transfer and excitation energy transfer. *Acc Chem Res* 2009; 42: 509-18.
- [5] Kavarnos GJ, Turro NJCR. Photosensitization by reversible electron transfer: Theories, experimental evidence, and examples. *Chem Rev* 1986; 86: 401-49.
